## **More than the eye can see – shedding new light on SARS-CoV-2 Lateral Flow Device-based immunoassays**

Garrit Koller<sup>1,^</sup>, Alexander P Morrell<sup>2,^</sup>, Rui Pedro Galão<sup>3</sup>, Suzanne Pickering<sup>3</sup>, Eithne MacMahon<sup>3,4</sup>, Joanna Johnson<sup>4</sup>, Konstantin Ignatyev<sup>5</sup>, Stuart JD Neil<sup>3</sup>, Sherif Elsharkawy<sup>2</sup>, Roland Fleck<sup>6</sup>, Pedro Miguel Pereira Machado<sup>6</sup>, Owen Addison<sup>2\*</sup>

<sup>1</sup>Centre for Host Microbiome Interactions, Faculty of Dentistry, Oral & Craniofacial Sciences, King's College London, London, United Kingdom.

<sup>2</sup>Centre for Oral, Clinical & Translational Sciences, Faculty of Dentistry, Oral & Craniofacial Sciences, King's College London, London, United Kingdom.

<sup>3</sup>Department of Infectious Diseases, School of Immunology & Microbial Sciences, King's College London, London, United Kingdom.

<sup>4</sup>Guy's and St Thomas' NHS Foundation Trust, London United Kingdom.

<sup>5</sup>Diamond Light Source, Harwell, United Kingdom.

<sup>6</sup>Centre for Ultrastructural Imaging, King's College London, London, United Kingdom.

<sup>^</sup>authors contributed equally as first author

<sup>\*</sup>corresponding

Faculty of Dentistry, Oral & Craniofacial Sciences,  
Floor 17, Guy's Tower, Guy's Hospital  
Great Maze Pond  
London SE1 9RT  
United Kingdom

Email: [owen.addison@kcl.ac.uk](mailto:owen.addison@kcl.ac.uk)

Tel: +44 020 7848 8478

Keywords:

SARS-CoV-2, lateral flow test, immunogold, gold nanoparticles, antigen test, X-ray fluorescence, specificity, sensitivity

## Abstract

Containing the global SARS-CoV-2 pandemic has been an unprecedented challenge due to high rates of both horizontal transmissivity and asymptomatic carriage. Lateral Flow Device (LFD) immunoassays were introduced in late 2020 to rapidly detect SARS-CoV-2 infection in asymptomatic or pre-symptomatic individuals in the population. Although LFD technologies have been used for over 60 years, their widespread use as a public health tool during a pandemic is unprecedented. By the end of 2020, data from studies into the efficacy of the LFDs emerged and showed these point-of-care devices to have very high specificity (ability to identify true negatives), but inadequate sensitivity with high false-negative rates. In particular, the low sensitivity (<50%) shown in several studies is a critical public health concern, given that asymptomatic or pre-symptomatic carriers may wrongly be assumed to be non-infectious, and posing a significant risk of further spread in the community. Here we show that the direct visual readout of SARS-CoV-2 LFDs is an inadequate approach to discriminate a potentially infective viral concentration in a bio-sample. Using high sensitivity synchrotron X-ray fluorescence imaging we were able to quantify significant immobilized antigen-antibody-label conjugates within the LFDs visually scored as negative. Correlating quantitative X-ray fluorescence measurements and qRT-PCR determined numbers of viral copies we identified that negatively scored samples could contain up to 100 PFU (equivalent here to ~10,000 RNA copies/test). This is of significant concern should these tests be used to control community spread. The study demonstrates where the shortcomings arise in many of the current direct-readout SARS-CoV-2 LFDs, namely being a deficiency in the readout as opposed to the potential level of detection of the test which is orders of magnitude higher. Our findings are of importance both to public health monitoring during the COVID-19 pandemic and to the rapid refinement of these tools for immediate and future applications.

## Introduction

Containing the global COVID-19 pandemic has been an unprecedented challenge due to high rates of both horizontal transmissivity and asymptomatic carriage. Tests to rapidly detect SARS-CoV-2 infection in asymptomatic and pre-symptomatic individuals in the mass population were introduced in late 2020 and are considered essential to enable people to gather safely in workplaces, educational settings and socially while maintaining control over virus transmission. However such testing programmes are expensive and in the USA alone could cost an estimated \$11-34 bn<sup>1</sup> annually. The most accessible and logistically scalable diagnostic test technologies are Lateral Flow Devices (LFDs) which have been used for over 60 years as facile immunoassays<sup>2</sup>. However, their use during the current COVID-19 pandemic is the first mass deployment of LFDs to address a significant public health crisis. The qualitative readouts of LFDs rely on immobilisation of chromogenic complexes within a test capture field. In most LFD designs, a diluted biological sample is deposited onto a nitrocellulose substrate and wicks laterally down a test strip. A positive test is indicated when a visually discernible line develops due to the deposition of sufficient antigen-bound nanoparticle-antibody complexes within the test field. Of the nanoparticle labels available, gold has been used extensively due to its flexibility for functionalization and is currently employed in several of the most widely used SARS-CoV-2 LFDs. However, the reliance on visual signal perception is a problem which introduces variability in reported LFD performance from different sampling or analysis settings<sup>3</sup>. This is particularly notable when low quantities of complexes are present in a test field. Alternative approaches have therefore been proposed to improve the sensitivity of LFD readouts, such as the use of laser-based detection systems<sup>4</sup> but these limit the usefulness to a broader population and have had limited uptake in the COVID-19 pandemic.

Much hope was placed in making LFD-based tests widely available and administered without significant training and infrastructure. However, by the end of 2020, clinical testing data from studies into the LFD efficacy emerged<sup>3, 5-8</sup> and demonstrated the disparity between manufacturer-reported and results obtained clinically in mass testing. These results indicated an ‘in-field’ sensitivity of as low as 48.9%, in one study missing 23 of 45 qRT-PCR confirmed positive cases but did demonstrate the tests had high specificity at >99.9%<sup>3, 9</sup>. Findings of inadequate sensitivity have since been reported in for many SARS-CoV-2 LFDs from different manufacturers, with few passing national benchmark tests<sup>7, 9</sup>. Notably, non-linear trends between the qRT-PCR *Ct*-value (cycle threshold –which provides an estimate of viral load) and false-negative rates were observed in numerous studies<sup>3, 6, 7, 10</sup>. High PCR *Ct*-values, suggesting low viral titres, were most likely to lead to detection failure, which has implications on viral transmission risk assessment<sup>11</sup>.

A public health concern is the spread of the SARS-CoV-2 virus by asymptomatic or pre-symptomatic individuals who may have an increased sense of confidence provided by a false-negative LFD result<sup>12</sup>. We hypothesize that the limited sensitivity of direct readout LFDs may be attributable to the failure of generating a signal (visual readout) due to insufficient density/mass of the immobilized reporter label, rather than the inability to bind to antigen at low titres or background signal. Here, we test this hypothesis using high sensitivity X-ray-based imaging with synchrotron light to quantify antigen-antibody-label conjugates within 'negative' result LFD tests.

Given the high importance placed in de-centralized testing for viral presence or infectivity, even moderate gains in signal intensity of these assays would dramatically improve control of spread and public health models guiding policy. This would stand particularly true if these enhanced readouts can be attained through readily accessible technologies with sensitivity to lower viral titres without introducing decreased specificity of the tests. As these tests exhibit high specificity, there is a potential opportunity to amplify the readout signal to increase sensitivity, given the low rates of false-positive results recorded in field trials<sup>3,9</sup>. We demonstrate in contrived, spiked tests (below the visual detection threshold) that these tests have the intrinsic capacity for lower detection limits.

## **Materials and Methods**

### **Preparation of viral stocks and inactivation**

An original stock of SARS-CoV-2 England 02/2020 strain (Public Health England, Colindale, UK) was expanded in Vero E6 cells (African green monkey kidney cells) maintained in Dulbecco's minimal essential medium (DMEM) containing 10% foetal bovine serum (FBS) at 37°C with 5% CO<sub>2</sub>. Supernatants were harvested 72 hours post-inoculation, aliquoted and stored at -80°C. Titres were determined by plaque assays, in which 10-fold serially diluted stocks were applied to Vero E6 cells and incubated for 1 hour at 37°C. An equal volume of a pre-warmed overlay (0.1% agarose in DMEM supplemented with 2% FCS) was then added to each well, and cultures were incubated for 72 hours as above, before fixation with 4% formaldehyde and stained with 0.05 % (w/v) crystal violet in ethanol. As a surrogate for infectivity within a given target cell line, viruses grown *in vitro* are quantified by measuring the plaque forming capacity of serial dilutions of supernatant and measured in plaque forming units (PFU). To generate non-infectious heat-inactivated (HI) particles, viral stocks were serially diluted, plaque-forming units were enumerated (PFU) and heat-treated at 70 °C for 30 minutes. Inactivation was confirmed by Vero cell culture, subjected to serially diluted and heat-treated viral particles.

### **Quantification of SARS-nCoV2 by qRT-PCR**

RNAs were extracted from 100ul of serially diluted SARS-CoV-2 stocks with pre-determined PFU inputs, using the Qiagen QIAamp Viral RNA Kit, following the manufacturer's instructions and final eluted in 60µl of water. RT-PCR reactions were performed with 5µl of eluted RNA, 4x TaqMan Fast Virus 1-Step Master mix (Applied Biosystems) and CDC's IDT Primer-Probes Sets targeting SARS-CoV-2 N gene regions or human RNase P, using a QuantStudio 5 qPCR machine (ThermoFisher Scientific). RNA standards were extracted as above from serial dilutions of a NATtrol™ SARS-CoV-2 Stock (ZeptoMetri) of known RNA viral load.

### **Spiking of LFD immunoassays**

Two Public Health England-approved SARS-CoV-2 Antigen LFDs (Innova Medical Group Inc, Monrovia, CA, USA) and SureScreen (SureScreen Technologies Ltd, Derby, UK) were used in the present study. The former has been widely used in clinical and asymptomatic screening of health workers, with superior performance to other LFDs submitted for approval. The contrived test samples were prepared by spiking LFD extraction buffer with

serially diluted heat-inactivated or live SARS-CoV-2 virus ranging from 0 - 10,000 PFU / test. The second SARS-CoV-2 LFD system (SureScreen) was spiked with equivalent doses of heat-inactivated virus only and used as a control/comparator for visual scoring. A qualitative optical readout was performed as per the manufacturer's instructions under identical lighting conditions for each test by multiple assessors and binary and visual-analogue score for intensity recorded.

### **Optical microscopy of LFDs**

LFDs were optically imaged using a Keyence VHX-7000 digital microscope (Keyence Corp, Osaka, Japan). Imaging variables were consistent between tests, including lighting (full ring), magnification (x20) and image exposure times (20 ms). LFD were imaged at similar times after deposition of the sample. Images were aligned and cropped for visualization. Image data from all heat-inactivated Innova LFDs were subsequently stacked and converted into a single 8-bit grayscale image. Image data were combined to prevent any discrepancies between samples attributed to RGB to greyscale conversion or data compression. Test regions on each LFD were isolated, and line profiles were extracted by averaging the image along the y-axis. The resulting profiles were subsequently background fitted and corrected to alleviate variations between LFD intensities caused by different white balances, likely due to trace moisture remaining.

### **Preparation of LFDs for $\mu$ XRF imaging**

After allowing to air dry, the test kits were disassembled and the nitrocellulose test strips mounted onto ultrapure fused silica slides (Spectrosil 2000, Heraeus Quarzglas GmbH, Kleinostheim, Germany), covered with 40  $\mu$ m thickness Kapton (DuPont Inc, Wilmington, DE, USA) before high sensitivity X-ray fluorescence (XRF) imaging. Only heat-inactivated Innova samples were prepared for X-ray measurements.

XRF measurements were conducted at the microfocus spectroscopy beamline I18 at the Diamond Light Source (Harwell, UK)<sup>13</sup>. After initial scouting acquisition maps, 1800 x 180  $\mu$ m (h x v) regions were imaged through the test and control zones of the nitrocellulose LFD strips, using a 5 x 5  $\mu$ m beam footprint, a 5  $\mu$ m horizontal and vertical step-size and a 400 ms acquisition time in air. An incident X-ray energy of 12.5 keV was used to result in Au L<sub>3</sub>M<sub>5</sub> fluorescence emission yield probabilities of ~70%. Two 4-element Vortex Si drift detectors (HitachiHi-Technologies Science, Tokyo, Japan) were positioned at 45° to the sample, and measurements were carried out at room temperature. The fluorescence signal from a homogeneous metal film reference standard (AXO, Dresden, Germany) was measured at the same geometry as the test samples to quantify the gold signal. Quantitative

calculations were performed in software PyMCA using inbuilt fundamental parameter algorithms<sup>14</sup>.

The extracted Au images from each LFD dilution were subsequently aligned and cropped. The image data displayed is on a common scale (95<sup>th</sup> percentile), allowing for a direct, visual comparison. A logarithmic scale is used to aid visualization as a high variability of Au concentration was observed between tests. Line profiles were extracted from each Au image by averaging pixels along the y-axis. Average Au values are reported, which reflect the average mass fraction within the test pad region of each LFD. Maximum values were also extracted from the test region and represent the maximum Au concentration within a single pixel (5 x 5µm).

### **Transmission Electron Microscopy**

Positive control regions from nitrocellulose LFD strips were sectioned and mounted in embedding resin, Embed 812 (EMS, Hatfield, PA, USA), polymerized for 24 h at 60 °C. Ultrathin sections (70 nm) were cut using a UC7 ultramicrotome (Leica Microsystems GmbH, Wetzlar, Germany) and collected on formvar /carbon-coated slot grids. In parallel, gold nanoparticles were eluted into ddH<sub>2</sub>O with sonication and centrifuged to separate. For imaging, particles were then diluted 1:1 in ddH<sub>2</sub>O and adsorbed on carbon film copper grids for 5 min. Samples were imaged using a TEM operated at 120 kV (JEOL JEM 1400Plus, JEOL, Tokyo, Japan) equipped with a 2000 x 2000 format CCD camera (JEOL Ruby CCD Camera, JEOL, Tokyo, Japan).

## Results and Discussion

The rapid development and implementation of assays for detecting SARS-CoV-2, by necessity, involved the exploitation of existing technologies with a limited time for thorough pre-market validation. Whilst applicable to all diagnostic platforms for SARS-CoV-2, including RT-qPCR based assays where initial protocols reported PCR-negative findings in many as 40% of biological specimens from known infections<sup>15</sup>, this was particularly applicable to LFDs<sup>3, 5, 7, 10, 16</sup>. Concerns were further raised following reporting of post-deployment surveillance studies of LFDs that concerns about test sensitivity have arisen, and many were quickly described as ‘not fit for purpose’<sup>5, 17</sup>. However, some observers suggested a more nuanced view on LFD utility, particularly as more insights are emerging on what constitutes infectious doses<sup>9</sup>, further supporting the potential public health value of LFD technology in mass testing.

Identifying approaches that can discriminate between the various contributing factors in assay design that combine to dictate the sensitivity and specificity of SARS-CoV-2 tests is an unsolved problem that needs urgent attention<sup>11</sup>. Insights gained from addressing these issues will likely aid future LFD development, including its additional role as a public health tool. To the authors’ knowledge, the present study is the first report of using synchrotron XRF-based detection to delineate the maximum achievable detection thresholds of these devices. By correlating different approaches, the signal limit of detection for each method can then be compared with the ‘gold standards’ of infectious dose (PFU) and corresponding diagnostic RT-qPCR-based quantitation.

Here we first demonstrate good agreement between the Innova LFD results spiked with live and heat-inactivated virus, with a consistent threshold of visual detection observed at a viral concentration between 20 and 100 PFU (**Figure 1a**). The findings of near-parity in infectious and heat-inactivated viral particles across platforms are critical from a technology-development perspective, facilitating method development and validation within biosafety level (BSL)I, rather than BSLIII, facilities, without appreciable decreases in assay performance at various PFU-levels. The finding of viral RNA being conserved in a similar manner<sup>18</sup> for heat inactivated samples may enable combined nucleic acid detection in tandem with antigen enrichment.

In keeping with the previous reports<sup>8</sup>, the two LFDs (Innova and SureScreen) had different visual detection thresholds. In both cases no signal was observed in spiked tests at <100 PFU. The Innova LFD uses immunolabelled gold nanoparticles as its core technology, which can be seen in **Figure 1b** on the nitrocellulose test strip either as visually detectable agglomerations of ~500 nm, or as visually undetectable dispersed single particles. The blue-



black readout for the Innova LFD on the test zone (compared with control zone) demonstrates surface plasmon resonance by approximation of antigen-bound gold nanoparticles.

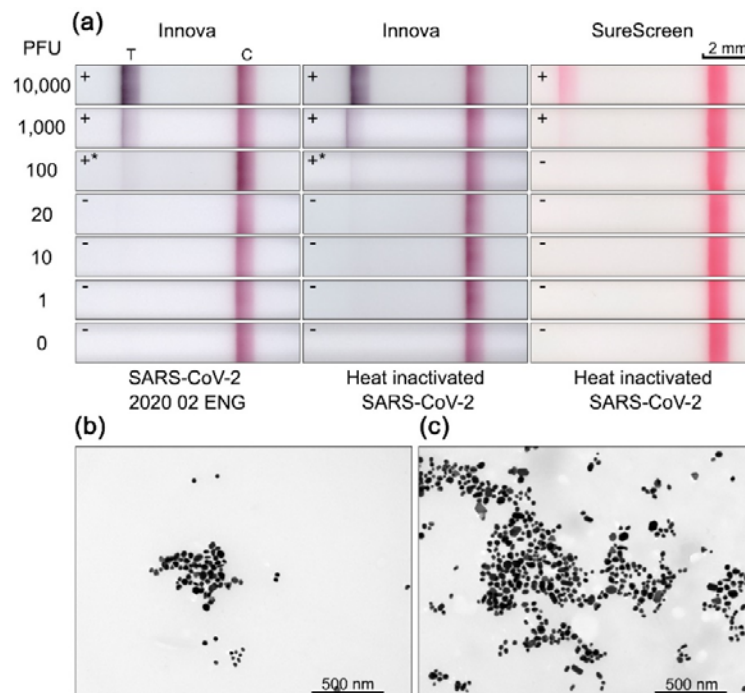

**Figure 1. (a)** Digital microscopy images of LFD strips from Innova (left and middle) and SureScreen (right) models. An excellent visual and performance agreement was observed between the live and the heat-inactivated virus. The SureScreen offered marginally lower visual sensitivity compared with the Innova tests. **(b)** and **(c)** TEM images of Au nanoparticles within Innova LFD immobilized on the nitrocellulose strip and subsequently eluted from the LFD, respectively.

Taken together, the data suggest that visual detection requires optimization of the nanoparticle agglomeration density and the surface area coverage within the test strip zone, both of which are affected by the individual nanoparticle size. Nanoparticles eluted from the Innova LFD (**Figure 1c**) exhibited a limited size range from ~40-60 nm. Thus, quantifying by mass provides a correlation with the numbers of antigen-antibody complexes present. The common use of immunolabelled gold nanoparticles in LFD also presents a unique opportunity for quantitative measurement using XRF over several orders of magnitude of viral titre to demonstrate avidity and binding modes, as well as background signal arising from non-specific deposition.

Results correlating the mass fraction of gold across the test strip with viral PFU counts are summarised in **Figure 2**. **Figure 2a** shows the standardized imaging regions for XRF within the Innova LFD strip across conjugate areas. **Figure 2b** shows on a common scale, mass fraction and pattern of gold nanoparticles detected. As a surrogate indicator of

antibody affinity and avidity for the complex deposited, a distinct pattern of gold distribution is observed within the test zones, with a steep amplitude transition to high-level Au deposition/signal and a gradual decrease to baseline in a dose-dependent manner, albeit becoming increasingly heterogeneous with decreasing viral PFU. In **Figure 2c**, the average mass fraction per spiked test viral PFU is reported and shows that all tests have elevated detectable gold within the test zone compared with the LFD run with no activation of the conjugate material (labelled E). The average mass fraction of gold for a test spiked at the lowest concentration (1 PFU) exhibited a threefold greater average mass fraction compared with the extraction buffer control sample ( $4.22$  vs  $1.40 \times 10^{-7}$ ) with the majority of signal being distributed within the test zone. Notably, for all ‘dilute’ samples ( $<100$  PFU) the maximum pixel intensity was similar and is likely a result of a consistent agglomeration phenomenon and a similar number of nanoparticles associating with an antigen. This observation is important with respect to potential strategies for better discriminating a readout, and the different densities observed, relative to the unbound control sample.

In **Figure 2a** a scattered 2D distribution of bright spots (high gold fluorescence) can be seen, with incomplete, but consistent presence across a substrate. An analogy can be drawn with the ‘Ben-Day’ dot printing approach, which was the hallmark of the 1960s American artist Roy Lichtenstein, where varying the density of identically sized and coloured dots generates tonal range detectable by the human eye. Through simple control of the density of ‘spots’ even in low numbers, contrast can be achieved. The potential of such approaches is illustrated here in the XRF map of the 100 PFU spiked LFD, where variability in clustering density (**Figure 2b**) correlates with visual contrast difference seen in **Figure 1a**. A simulation of increasing the density of a signal is shown in **Figure 3**. The density of the detected antigen-antibody complex was increased without altering signal intensity or total number of pixels with sufficient XRF signal for a 20 PFU spike test (**Figure 3a,b**). This provided a concentrated band with sufficient average mass fraction of Au that would be visibly detectable (**Figure 3c,d**).

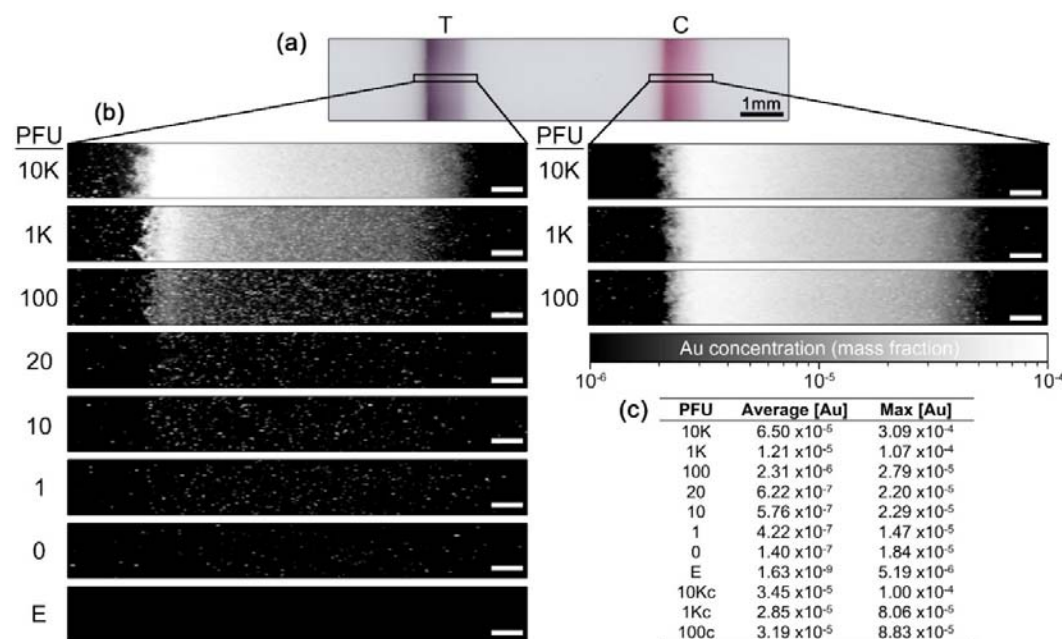

**Figure 2.** Mass fractions for viral dilution series (a) Digital microscopy image highlighting regions of interest within LFDs selected for subsequent synchrotron XRF measurements. (b) Au XRF images, expressed as mass fractions, on a common logarithmic scale are shown from the test and control strips from LFDs with descending PFU values. (c) a summary of quantitative values extracted from synchrotron XRF images, including average and maximum values within the image data.

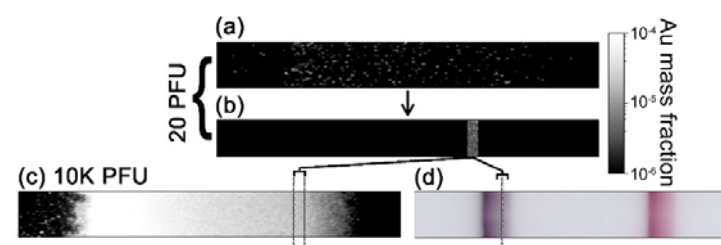

**Figure 3.** (a) Quantitative XRF Au image of 20 PFU spiked LFD across the test zone. (b) Simulation of a test zone where pixels from (a) were condensed into a contrived band. The resultant concentration and density of the simulated image would now be visibly detectable. This is demonstrated by comparison with the XRF (c) and optical image (d) for the 10K PFU test.

Plots of the average gold mass fraction for each viral exposure PFU across the test zone are shown in **Figure 4a,b** and summarised in **Figure 4c** where a log-linear trend between increasing mass fraction of gold and PFU from 1 -100 is observed, highlighting a high signal-to-noise ratio. This clear pattern ( $R^2=0.98$ ) gives confidence in the potential sensitivity of the test when used with dilute biological samples and further supports that efforts for developing methods for signal amplification should be made. Similar analysis approaches were subsequently applied to standardized optical imaging of the LFD tests. Surprisingly, even at extremely low pixel intensity for low viral counts (1-20 PFU), a signal pattern similar to that

observed for XRF data was detected (**Figure 4d-f**). This finding demonstrates the potential utility of simple optical means of increasing detection sensitivity and may guide further work on minimal detection signal frequency and amplitude across a test field required to provide robust readouts.

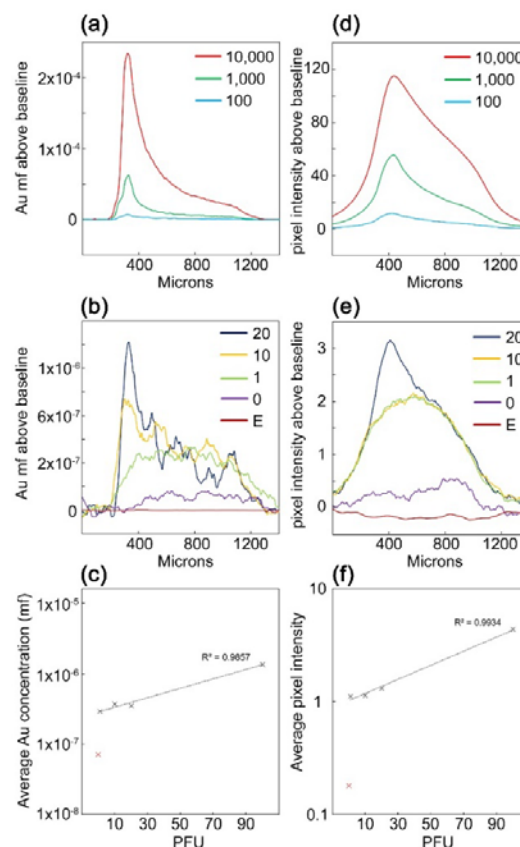

**Figure 4.** (a) and (b) Line traces extracted from XRF LFD images are shown. (c) Displays the log-linear trend between the average Au concentration acquired from XRF data and the respective PFU applied to the LFD. (d) and (e) Line traced extracted from the optical microscopy images are shown. (f) Displays the log-linear trend between the average pixel intensity acquired from the optical microscopy data and the respective PFU applied to the LFD.

A threshold for subjective detection was found to lie between 20 and 100 PFU for the LFDs examined. This approximates the cycle threshold observed for previous studies correlating viral numbers from qPCR cycle numbers and the ability to form cytotoxic plaques in cell culture<sup>19-24</sup>. In this study RT-qPCR validation demonstrated that 100 PFU/test was equivalent to ~10,000 RNA copies/test and Ct value of 27. Whilst there is no exact measure of how many viral particles are considered infectious, the gold standard of confirming and quantifying the ability of SARS CoV-2 to infect is a culture-based approach, with some studies demonstrating infectivity, as measured by cytopathic effects in a dose-dependent manner<sup>19, 21, 25-28</sup>. Several studies have conducted side-by-side comparisons between the qRT-

PCR  $C_t$  value of a clinical specimen and viral load, establishing strong linear relationships between the  $C_t$  value of samples and the corresponding infectivity ascribed using culture-based assays. Given the high degree of correlation between detection modalities within our study, we demonstrate that the improvements with simple, optical-based methods may enable reduced false-negative rates. This is particularly true for viral loads  $<100$  PFU/test and improvements in this range may aid defining an infectious detection threshold. The advantage of such optimised LFDs over RT-qPCR detection is that they are not confounded by shedding of residual viral RNA that may yield positive results for several weeks after resolution of the infection. Patients with prior SARS-CoV-2 infection may have positive PCR results in samples taken many weeks afterwards, due to the presence detectable RNA at high  $C_t$  values, but do not harbour infectious virus. This is a real challenge for infection control policies and has led to the policy of avoidance of testing anyone with known infection in the prior 90 days. In some way, the lesser sensitivity of SARS-CoV-2 LFD tests has therefore been viewed as advantageous if it can be correlated with infectiousness, but must be sensitive enough to identify infectious positives which is the current deficiency of current designs. The optimal LFD for SARS-CoV-2 would therefore be less sensitive than PCR testing, but sensitive enough to detect virus in quantities likely be infectious. This is the clear technological development need for future SARS-CoV-2 LFD assays.

## Conclusions

The present study highlights significant weaknesses of currently used LFD devices, potentially generalizable, mechanistic insights into the activation of the test zones, as well as providing the basis for improved SARS CoV-2 detection through increased signal amplification. Although synchrotron-based XRF approaches are not a readily accessible means of validating assays, the data produced clearly demonstrates the technology platform is capable of predictably immobilizing viral antigen from dilute specimen and enables improvements of readout signal without increasing false positivity. The results delineate theoretical detection thresholds and the contribution of signal to noise, or unspecific events affecting signal interpretation, with hundred-fold improvements potentially possible. Attaining these improvements would match, and likely surpass, the resource-intensive RT-qPCR methodology. Furthermore, it highlights that, despite the plethora of proposed methods published to improve point of care test sensitivity and specificity, few of these have found widespread application within this decade-old, but tried-and-tested, diagnostic modality.

## Acknowledgements

The authors gratefully acknowledge the rapid access beamtime session SP28216 awarded at the Diamond Light Source.

## References

1. AHIP New study: COVID-19 testing costs could reach \$25 billion a year for diagnostic, \$19 billion a year for antibody. <https://www.ahip.org/new-study-covid-19-testing-costs/>, accessed 03/03/2021.
2. Plotz, C. M.; Singer, J. M., The latex fixation test. I. Application to the serologic diagnosis of rheumatoid arthritis. *Am J Med* **1956**, 21 (6), 888-92.
3. Wise, J. Covid-19: Lateral flow tests miss over half of cases, Liverpool pilot data show. *Br Med J* **2020**, 371, m4848.
4. Peng, T.; Liu, X.; Adams, L. G.; Agarwal, G.; Akey, B.; Cirillo, J.; Deckert, V.; Delfan, S.; Fry, E.; Han, Z.; Hemmer, P.; Kattawar, G.; Kim, M.; Lee, M. C.; Lu, C.; Mogford, J.; Nessler, R.; Neuman, B.; Nie, X.; Pan, J.; Pryor, J.; Rajil, N.; Shih, Y.; Sokolov, A.; Svidzinsky, A.; Wang, D.; Yi, Z.; Zheltikov, A.; Scully, M., Enhancing sensitivity of lateral flow assay with application to SARS-CoV-2. *Appl Phys Lett* **2020**, 117 (12), 120601.
5. Deeks, J. J.; Raffle, A. E., Lateral flow tests cannot rule out SARS-CoV-2 infection. *Br Med J* **2020**, 371, m4787.
6. Peto, T. E., COVID-19: Rapid Antigen detection for SARS-CoV-2 by lateral flow 2 assay: a national systematic evaluation for mass-testing *UK COVID-19 Lateral Flow Oversight Team*. **2021** <https://doi.org/10.1101/2021.01.13.21249563>, accessed 13.02.2021.
7. Preliminary report from the Joint PHE Porton Down & University of Oxford SARS-CoV-2 test development and validation cell: Rapid evaluation of Lateral Flow Viral Antigen detection devices (LFDs) for mass community testing. [https://www.ox.ac.uk/sites/files/oxford/media\\_wysiwyg/UK%20evaluation\\_PHE%20Porton%20Down%20%20University%20of%20Oxford\\_final.pdf](https://www.ox.ac.uk/sites/files/oxford/media_wysiwyg/UK%20evaluation_PHE%20Porton%20Down%20%20University%20of%20Oxford_final.pdf), accessed 06/03/2021
8. Pickering, S.; Betancor, G.; Galao, R. P.; Merrick, B.; Signell, A. W.; Wilson, H. D.; Kia Ik, M. T.; Seow, J.; Graham, C.; Acors, S.; Kouphou, N.; Steel, K. J. A.; Hemmings, O.; Patel, A.; Nebbia, G.; Douthwaite, S.; O'Connell, L.; Luptak, J.; McCoy, L. E.; Brouwer, P.; van Gils, M. J.; Sanders, R. W.; Martinez Nunez, R.; Bisnauthsing, K.; O'Hara, G.; MacMahon, E.; Batra, R.; Malim, M. H.; Neil, S. J. D.; Doores, K. J.; Edgeworth, J. D., Comparative assessment of multiple COVID-19 serological technologies supports continued evaluation of point-of-care lateral flow assays in hospital and community healthcare settings. *PLoS Pathog* **2020**, 16 (9), e1008817.
9. Mina, M. J.; Peto, T. E.; Garcia-Finana, M.; Semple, M. G.; Buchan, I. E., Clarifying the evidence on SARS-CoV-2 antigen rapid tests in public health responses to COVID-19. *Lancet* **2021**, [https://doi.org/10.1016/S0140-6736\(21\)00425-6](https://doi.org/10.1016/S0140-6736(21)00425-6)
10. Pickering, S.; Batra, R.; Snell, L. B.; Merrick, B.; Nebbia, G.; Douthwaite, S.; Patel, A.; Ik, M. T. K.; Patel, B.; Charalampous, T.; Alcolea-Medina, A.; Lista, M. J.; Cliff, P. R.; Cunningham, E.; Mullen, J.; Doores, K. J.; Edgeworth, J. D.; Malim, M. H.; Neil, S. J. D.; Galao, R. P., Comparative performance of SARS CoV-2 lateral flow antigen tests demonstrates their utility for high sensitivity detection of infectious virus in clinical specimens. *medRxiv* **2021**, 2021.02.27.21252427
11. Woloshin, S.; Patel, N.; Kesselheim, A. S., False Negative Tests for SARS-CoV-2 Infection - Challenges and Implications. *N Engl J Med* **2020**, 383 (6), e38.
12. Byambasuren, O.; Cardona, M.; Bell, K.; Clark, J.; McLaws, M.-L.; Glasziou, P., Estimating the extent of asymptomatic COVID-19 and its potential for community transmission: Systematic review and meta-analysis. *J Assoc Med Microbiol Inf Dis Can* **2020**, 5 (4), 223-234.
13. Mosselmans, J. F.; Quinn, P. D.; Dent, A. J.; Cavill, S. A.; Moreno, S. D.; Peach, A.; Leicester, P. J.; Keylock, S. J.; Gregory, S. R.; Atkinson, K. D.; Rosell, J. R., I18--the

microfocus spectroscopy beamline at the Diamond Light Source. *J Synchrotron Radiat* **2009**, 16 (Pt 6), 818-24.

14. Solé, V. A.; Papillon, E.; Cotte, M.; Walter, P.; Susini, J., A multiplatform code for the analysis of energy-dispersive X-ray fluorescence spectra. *Spectrochimica Acta Part B: Atomic Spectroscopy* **2007**, 62 (1), 63-68.

15. Yang, Y.; Yang, M.; Yuan, J.; Wang, F.; Wang, Z.; Li, J.; Zhang, M.; Xing, L.; Wei, J.; Peng, L.; Wong, G.; Zheng, H.; Wu, W.; Shen, C.; Liao, M.; Feng, K.; Li, J.; Yang, Q.; Zhao, J.; Liu, L.; Liu, Y., Comparative Sensitivity of Different Respiratory Specimen Types for Molecular Diagnosis and Monitoring of SARS-CoV-2 Shedding. *Innovation (NY)* **2020**, 1 (3), 100061.

16. Tehrani, Z. R.; Saadat, S.; Saleh, E.; Ouyang, X.; Constantine, N.; DeVico, A. L.; Harris, A. D.; Lewis, G. K.; Kottlil, S.; Sajadi, M. M., Specificity and Performance of Nucleocapsid and Spike-based SARS-CoV-2 Serologic Assays. *medRxiv* **2020** 2020.08.05.20168476

17. Kmietowicz, Z., Covid-19: Controversial rapid test policy divides doctors and scientists. *Br Med J* **2021**, 372, n81.

18. Lista, M. J.; Page, R.; Sertkaya, H.; Matos, P. M.; Ortiz-Zapater, E.; Maguire, T. J. A.; Poulton, K.; O'Byrne, A. M.; Bouton, C.; Dickenson, R. E.; Ficarelli, M.; Howard, M.; Betancor, G.; Galao, R. P.; Pickering, S.; Signell, A. W.; Wilson, H.; Cliff, P.; Kia Ik, M. T.; Patel, A.; MacMahon, E.; Cunningham, E.; Agromayor, M.; Martin-Serrano, J.; Perucha, E.; Mischo, H. E.; Shankar-Hari, M.; Batra, R.; Edgeworth, J.; Malim, M. H.; Neil, S.; Martinez-Nunez, R. T. Resilient SARS-CoV-2 diagnostics workflows including viral heat inactivation. *medRxiv* **2020**, 2020.04.22.20074351

19. Basile, K.; McPhie, K.; Carter, I.; Alderson, S.; Rahman, H.; Donovan, L.; Kumar, S.; Tran, T.; Ko, D.; Sivaruban, T.; Ngo, C.; Toi, C.; O'Sullivan, M. V.; Sintchenko, V.; Chen, S. C.; Maddocks, S.; Dwyer, D. E.; Kok, J., Cell-based culture of SARS-CoV-2 informs infectivity and safe de-isolation assessments during COVID-19. *Clin Infect Dis* **2020**, doi: 10.1093/cid/ciaa1579

20. Brown, C. S.; Clare, K.; Chand, M.; Andrews, J.; Auckland, C.; Beshir, S.; Choudhry, S.; Davies, K.; Freeman, J.; Gallini, A.; Moores, R.; Patel, T.; Poznalska, G.; Rodger, A.; Roberts, S.; Rooney, C.; Wilcox, M.; Warren, S.; Ellis, J.; Gopal, R.; Dunning, J.; Zambon, M.; Hopkins, S., Snapshot PCR surveillance for SARS-CoV-2 in hospital staff in England. *J Infect* **2020**, 81 (3), 427-434.

21. L'Huillier, A. G.; Torriani, G.; Pigny, F.; Kaiser, L.; Eckerle, I., Culture-Competent SARS-CoV-2 in Nasopharynx of Symptomatic Neonates, Children, and Adolescents. *Emerg Infect Dis* **2020**, 26 (10), 2494-2497.

22. Gniazdowski, V.; Morris, C. P.; Wohl, S.; Mehoke, T.; Ramakrishnan, S.; Thielen, P.; Powell, H.; Smith, B.; Armstrong, D. T.; Herrera, M.; Reifsnnyder, C.; Sevdali, M.; Carroll, K. C.; Pekosz, A.; Mostafa, H. H., Repeat COVID-19 Molecular Testing: Correlation of SARS-CoV-2 Culture with Molecular Assays and Cycle Thresholds. *Clin Infect Dis* **2020**, doi: 10.1093/cid/ciaa1616.

23. Xiao, F.; Sun, J.; Xu, Y.; Li, F.; Huang, X.; Li, H.; Zhao, J.; Huang, J.; Zhao, J., Infectious SARS-CoV-2 in Feces of Patient with Severe COVID-19. *Emerg Infect Dis* **2020**, 26 (8), 1920-1922.

24. Bwire, G. M.; Majigo, M. V.; Njiro, B. J.; Mawazo, A., Detection profile of SARS-CoV-2 using RT-PCR in different types of clinical specimens: A systematic review and meta-analysis. *J Med Virol* **2021**, 93 (2), 719-725.

25. Bullard, J.; Dust, K.; Funk, D.; Strong, J. E.; Alexander, D.; Garnett, L.; Boodman, C.; Bello, A.; Hedley, A.; Schiffman, Z.; Doan, K.; Bastien, N.; Li, Y.; Van Caesele, P. G.;



Poliquin, G., Predicting infectious SARS-CoV-2 from diagnostic samples. *Clin Infect Dis* **2020**, doi: [10.1093/cid/ciaa638](https://doi.org/10.1093/cid/ciaa638)

26. Jefferson, T.; Spencer, E. A.; Brassey, J.; Heneghan, C., Viral cultures for COVID-19 infectious potential assessment - a systematic review. *Clin Infect Dis* **2020**, doi: [10.1093/cid/ciaa1764](https://doi.org/10.1093/cid/ciaa1764)

27. La Scola, B.; Le Bideau, M.; Andreani, J.; Hoang, V. T.; Grimaldier, C.; Colson, P.; Gautret, P.; Raoult, D., Viral RNA load as determined by cell culture as a management tool for discharge of SARS-CoV-2 patients from infectious disease wards. *Eur J Clin Microbiol Infect Dis* **2020**, 39 (6), 1059-1061.

28. Singanayagam, A.; Patel, M.; Charlett, A.; Lopez Bernal, J.; Saliba, V.; Ellis, J.; Ladhani, S.; Zambon, M.; Gopal, R., Duration of infectiousness and correlation with RT-PCR cycle threshold values in cases of COVID-19, England, January to May 2020. *Euro Surveill* **2020**, 25 (32).
